# Supplementary material for: Systems spatiotemporal dynamics of traumatic brain injury at single cell resolution reveals humanin as a therapeutic target
Source: Research Square preprint supplement (doi:10.21203/rs.3.rs-765030/v1), 2021-08-13
Supplement: Supplementary file 15 [file e6636ed299ef2501350505ec.xlsx]

## Sheet: Sheet1
Tissue	Timepoint	Cell Type	ED Rank	SVM Rank	Subset DEG Rank	Average Rank	Cell Fraction Shift
Blood	24hrs	B.Cells	1	7	5	4.33333	No
Blood	24hrs	CD4T	2	5	1	2.66667	No
Blood	24hrs	CD8T	3	1	1	1.66667	No
Blood	24hrs	GRAN	8	4	5	5.66667	Yes
Blood	24hrs	Ly6c+.Mon	5	3	3	3.66667	No
Blood	24hrs	MEGK	6	2	8	5.33333	No
Blood	24hrs	NK.Cells	4	6	3	4.33333	No
Blood	24hrs	Treml4+.Mon	7	8	5	6.66667	No
Blood	7days	B.Cells	1	3	5	3	No
Blood	7days	CD4T	5	4	2	3.66667	No
Blood	7days	CD8T	4	1	1	2	No
Blood	7days	GRAN	7	7	7	7	No
Blood	7days	Ly6c+.Mon	3	2	3	2.66667	No
Blood	7days	MEGK	8	8	7	7.66667	No
Blood	7days	NK.Cells	2	5	3	3.33333	No
Blood	7days	Treml4+.Mon	6	6	6	6	No
Frontal Cortex	24hrs	aMG	3	10	6	6.33333	No
Frontal Cortex	24hrs	ASC	1	2	1	1.33333	No
Frontal Cortex	24hrs	END	2	6	4	4	No
Frontal Cortex	24hrs	INT.Calb2	21	14	13	16	No
Frontal Cortex	24hrs	INT.Dlk1	15	19	13	15.6667	No
Frontal Cortex	24hrs	INT.Foxp1	17	15	13	15	No
Frontal Cortex	24hrs	INT.Foxp2	23	23	13	19.6667	No
Frontal Cortex	24hrs	INT.Nrip3	14	3	9	8.66667	No
Frontal Cortex	24hrs	INT.Sst	22	23	13	19.3333	No
Frontal Cortex	24hrs	INT.Tac1	25	21	13	19.6667	No
Frontal Cortex	24hrs	INT.Trh	16	16	13	15	No
Frontal Cortex	24hrs	INT.Vip	12	9	13	11.3333	No
Frontal Cortex	24hrs	Layer23	8	1	2	3.66667	No
Frontal Cortex	24hrs	Layer6	24	23	13	20	No
Frontal Cortex	24hrs	MAC	10	11	12	11	No
Frontal Cortex	24hrs	MG	6	13	13	10.6667	No
Frontal Cortex	24hrs	NEU.Zscan20	20	22	13	18.3333	No
Frontal Cortex	24hrs	NeuroG1	9	12	10	10.3333	No
Frontal Cortex	24hrs	NeuroG2	13	18	10	13.6667	No
Frontal Cortex	24hrs	nODC	19	20	13	17.3333	No
Frontal Cortex	24hrs	ODC	4	4	5	4.33333	No
Frontal Cortex	24hrs	OPC	5	8	8	7	No
Frontal Cortex	24hrs	PER	7	7	3	5.66667	No
Frontal Cortex	24hrs	PIR	11	5	7	7.66667	No
Frontal Cortex	24hrs	SMC	18	17	12	15.6667	No
Frontal Cortex	7days	aMG	3	11	2	5.33333	No
Frontal Cortex	7days	ASC	2	7	5	4.66667	No
Frontal Cortex	7days	END	1	8	5	4.66667	No
Frontal Cortex	7days	INT.Calb2	12	2	5	6.33333	No
Frontal Cortex	7days	INT.Dlk1	9	4	3	5.33333	No
Frontal Cortex	7days	INT.Foxp1	16	16	18	16.6667	No
Frontal Cortex	7days	INT.Foxp2	23	3	11	12.3333	No
Frontal Cortex	7days	INT.Nrip3	6	5	11	7.33333	No
Frontal Cortex	7days	INT.Sst	20	22	18	20	No
Frontal Cortex	7days	INT.Tac1	25	25	18	22.6667	No
Frontal Cortex	7days	INT.Trh	22	1	18	13.6667	No
Frontal Cortex	7days	INT.Vip	21	20	18	19.6667	No
Frontal Cortex	7days	Layer23	10	6	11	9	No
Frontal Cortex	7days	Layer6	24	21	18	21	No
Frontal Cortex	7days	MAC	14	15	18	15.6667	No
Frontal Cortex	7days	MG	5	17	5	9	Yes
Frontal Cortex	7days	NEU.Zscan20	19	24	11	18	No
Frontal Cortex	7days	NeuroG1	8	9	4	7	No
Frontal Cortex	7days	NeuroG2	11	10	1	7.33333	No
Frontal Cortex	7days	nODC	15	19	5	13	No
Frontal Cortex	7days	ODC	4	13	11	9.33333	No
Frontal Cortex	7days	OPC	7	12	5	8	No
Frontal Cortex	7days	PER	13	18	11	14	No
Frontal Cortex	7days	PIR	18	14	18	16.6667	No
Frontal Cortex	7days	SMC	17	23	11	17	No
Hippocampus	24hrs	aMG	2	4	2	2.66667	No
Hippocampus	24hrs	ASC	1	1	1	1	No
Hippocampus	24hrs	CA1d	13	23	21	19	Yes
Hippocampus	24hrs	CA1v	19	8	13	13.3333	Yes
Hippocampus	24hrs	CA2.3	17	21	21	19.6667	Yes
Hippocampus	24hrs	CPE	14	17	13	14.6667	Yes
Hippocampus	24hrs	CR	16	20	13	16.3333	No
Hippocampus	24hrs	DG	20	2	13	11.6667	Yes
Hippocampus	24hrs	END	4	9	8	7	No
Hippocampus	24hrs	ENT	12	10	6	9.33333	Yes
Hippocampus	24hrs	EPEN	21	15	8	14.6667	No
Hippocampus	24hrs	FB	23	12	13	16	No
Hippocampus	24hrs	INT	10	22	13	15	Yes
Hippocampus	24hrs	MAC	7	3	4	4.66667	Yes
Hippocampus	24hrs	MG	5	5	3	4.33333	No
Hippocampus	24hrs	NeuroG1	15	16	13	14.6667	No
Hippocampus	24hrs	NeuroG2	18	13	8	13	No
Hippocampus	24hrs	nODC	9	14	8	10.3333	No
Hippocampus	24hrs	ODC	3	6	7	5.33333	No
Hippocampus	24hrs	OPC	6	18	13	12.3333	No
Hippocampus	24hrs	PER	22	19	8	16.3333	No
Hippocampus	24hrs	SMC	8	11	4	7.66667	No
Hippocampus	24hrs	SUB	11	7	21	13	Yes
Hippocampus	7days	aMG	2	8	5	5	No
Hippocampus	7days	ASC	4	2	2	2.66667	Yes
Hippocampus	7days	CA1d	12	6	5	7.66667	No
Hippocampus	7days	CA1v	10	12	15	12.3333	No
Hippocampus	7days	CA2.3	20	18	21	19.6667	No
Hippocampus	7days	CPE	6	5	2	4.33333	No
Hippocampus	7days	CR	17	13	5	11.6667	No
Hippocampus	7days	DG	8	7	1	5.33333	No
Hippocampus	7days	END	3	9	5	5.66667	No
Hippocampus	7days	ENT	21	3	21	15	No
Hippocampus	7days	EPEN	23	23	21	22.3333	No
Hippocampus	7days	FB	14	11	15	13.3333	No
Hippocampus	7days	INT	19	22	15	18.6667	No
Hippocampus	7days	MAC	9	19	5	11	No
Hippocampus	7days	MG	5	14	5	8	No
Hippocampus	7days	NeuroG1	22	15	15	17.3333	No
Hippocampus	7days	NeuroG2	18	21	15	18	No
Hippocampus	7days	nODC	13	16	15	14.6667	No
Hippocampus	7days	ODC	1	1	5	2.33333	No
Hippocampus	7days	OPC	7	10	5	7.33333	No
Hippocampus	7days	PER	15	20	5	13.3333	No
Hippocampus	7days	SMC	11	17	2	10	No
Hippocampus	7days	SUB	16	4	5	8.33333	No

## Sheet: Sheet4
Tissue	Timepoint	Cell Type	ED Rank	SVM Rank	DEG Rank	Subset DEG Rank	Average Rank	Cell Fraction Shift
Blood	24hrs	B.Cells	1	7	3	5	4	No
Blood	24hrs	CD4T	2	5	1	1	2.25	No
Blood	24hrs	CD8T	3	1	2	1	1.75	No
Blood	24hrs	GRAN	8	4	7	5	6	Yes
Blood	24hrs	Ly6c+.Mon	5	3	4	3	3.75	No
Blood	24hrs	MEGK	6	2	8	8	6	No
Blood	24hrs	NK.Cells	4	6	5	3	4.5	No
Blood	24hrs	Treml4+.Mon	7	8	6	5	6.5	No
Blood	7days	B.Cells	1	3	1	5	2.5	No
Blood	7days	CD4T	5	4	3	2	3.5	No
Blood	7days	CD8T	4	1	2	1	2	No
Blood	7days	GRAN	7	7	7	7	7	No
Blood	7days	Ly6c+.Mon	3	2	5	3	3.25	No
Blood	7days	MEGK	8	8	7	7	7.5	No
Blood	7days	NK.Cells	2	5	4	3	3.5	No
Blood	7days	Treml4+.Mon	6	6	6	6	6	No
Frontal Cortex	24hrs	ASC	1	2	1	1	1.25	No
Frontal Cortex	7days	END	1	8	1	5	3.75	No
Frontal Cortex	24hrs	END	2	6	4	4	4	No
Frontal Cortex	24hrs	ODC	4	4	3	5	4	No
Frontal Cortex	24hrs	Layer23	8	1	6	2	4.25	No
Frontal Cortex	7days	ASC	2	7	3	5	4.25	No
Frontal Cortex	7days	aMG	3	11	2	2	4.5	No
Frontal Cortex	24hrs	aMG	3	10	2	6	5.25	No
Frontal Cortex	24hrs	PER	7	7	7	3	6	No
Frontal Cortex	24hrs	OPC	5	8	5	8	6.5	No
Frontal Cortex	7days	INT.Dlk1	9	4	11	3	6.75	No
Frontal Cortex	7days	INT.Nrip3	6	5	5	11	6.75	No
Frontal Cortex	7days	INT.Calb2	12	2	9	5	7	No
Frontal Cortex	7days	NeuroG1	8	9	7	4	7	No
Frontal Cortex	7days	OPC	7	12	6	5	7.5	No
Frontal Cortex	7days	NeuroG2	11	10	10	1	8	No
Frontal Cortex	7days	ODC	4	13	4	11	8	No
Frontal Cortex	24hrs	PIR	11	5	11	7	8.5	No
Frontal Cortex	24hrs	INT.Nrip3	14	3	9	9	8.75	No
Frontal Cortex	7days	MG	5	17	8	5	8.75	Yes
Frontal Cortex	7days	Layer23	10	6	12	11	9.75	No
Frontal Cortex	24hrs	MG	6	13	8	13	10	No
Frontal Cortex	24hrs	NeuroG1	9	12	9	10	10	No
Frontal Cortex	24hrs	MAC	10	11	13	12	11.5	No
Frontal Cortex	24hrs	INT.Vip	12	9	15	13	12.25	No
Frontal Cortex	24hrs	NeuroG2	13	18	12	10	13.25	No
Frontal Cortex	7days	INT.Foxp2	23	3	16	11	13.25	No
Frontal Cortex	7days	INT.Trh	22	1	12	18	13.25	No
Frontal Cortex	7days	nODC	15	19	15	5	13.5	No
Frontal Cortex	7days	PER	13	18	12	11	13.5	No
Frontal Cortex	24hrs	INT.Foxp1	17	15	15	13	15	No
Frontal Cortex	24hrs	INT.Trh	16	16	15	13	15	No
Frontal Cortex	24hrs	SMC	18	17	13	12	15	No
Frontal Cortex	24hrs	INT.Dlk1	15	19	15	13	15.5	No
Frontal Cortex	24hrs	INT.Calb2	21	14	15	13	15.75	No
Frontal Cortex	7days	MAC	14	15	19	18	16.5	No
Frontal Cortex	24hrs	nODC	19	20	15	13	16.75	No
Frontal Cortex	7days	SMC	17	23	17	11	17	No
Frontal Cortex	7days	INT.Foxp1	16	16	19	18	17.25	No
Frontal Cortex	7days	PIR	18	14	19	18	17.25	No
Frontal Cortex	24hrs	NEU.Zscan20	20	22	15	13	17.5	No
Frontal Cortex	7days	NEU.Zscan20	19	24	17	11	17.75	No
Frontal Cortex	24hrs	INT.Sst	22	23	15	13	18.25	No
Frontal Cortex	24hrs	INT.Foxp2	23	23	15	13	18.5	No
Frontal Cortex	24hrs	INT.Tac1	25	21	15	13	18.5	No
Frontal Cortex	24hrs	Layer6	24	23	15	13	18.75	No
Frontal Cortex	7days	INT.Vip	21	20	19	18	19.5	No
Frontal Cortex	7days	INT.Sst	20	22	19	18	19.75	No
Frontal Cortex	7days	Layer6	24	21	19	18	20.5	No
Frontal Cortex	7days	INT.Tac1	25	25		18	22.6667	No
Hippocampus	24hrs	aMG	2	4	2	2	2.5	No
Hippocampus	24hrs	ASC	1	1	1	1	1	No
Hippocampus	24hrs	CA1d	13	23	13	21	17.5	Yes
Hippocampus	24hrs	CA1v	19	8	18	13	14.5	Yes
Hippocampus	24hrs	CA2.3	17	21	23	21	20.5	Yes
Hippocampus	24hrs	CPE	14	17	9	13	13.25	Yes
Hippocampus	24hrs	CR	16	20	18	13	16.75	No
Hippocampus	24hrs	DG	20	2	11	13	11.5	Yes
Hippocampus	24hrs	END	4	9	5	8	6.5	No
Hippocampus	24hrs	ENT	12	10	9	6	9.25	Yes
Hippocampus	24hrs	EPEN	21	15	13	8	14.25	No
Hippocampus	24hrs	FB	23	12	18	13	16.5	No
Hippocampus	24hrs	INT	10	22	18	13	15.75	Yes
Hippocampus	24hrs	MAC	7	3	7	4	5.25	Yes
Hippocampus	24hrs	MG	5	5	4	3	4.25	No
Hippocampus	24hrs	NeuroG1	15	16	18	13	15.5	No
Hippocampus	24hrs	NeuroG2	18	13	13	8	13	No
Hippocampus	24hrs	nODC	9	14	11	8	10.5	No
Hippocampus	24hrs	ODC	3	6	3	7	4.75	No
Hippocampus	24hrs	OPC	6	18	6	13	10.75	No
Hippocampus	24hrs	PER	22	19	13	8	15.5	No
Hippocampus	24hrs	SMC	8	11	8	4	7.75	No
Hippocampus	24hrs	SUB	11	7	13	21	13	Yes
Hippocampus	7days	aMG	2	8	2	5	4.25	No
Hippocampus	7days	ASC	4	2	3	2	2.75	Yes
Hippocampus	7days	CA1d	12	6	11	5	8.5	No
Hippocampus	7days	CA1v	10	12	16	15	13.25	No
Hippocampus	7days	CA2.3	20	18	22	21	20.25	No
Hippocampus	7days	CPE	6	5	6	2	4.75	No
Hippocampus	7days	CR	17	13	10	5	11.25	No
Hippocampus	7days	DG	8	7	8	1	6	No
Hippocampus	7days	END	3	9	4	5	5.25	No
Hippocampus	7days	ENT	21	3	11	21	14	No
Hippocampus	7days	EPEN	23	23	22	21	22.25	No
Hippocampus	7days	FB	14	11	16	15	14	No
Hippocampus	7days	INT	19	22	16	15	18	No
Hippocampus	7days	MAC	9	19	11	5	11	No
Hippocampus	7days	MG	5	14	5	5	7.25	No
Hippocampus	7days	NeuroG1	22	15	16	15	17	No
Hippocampus	7days	NeuroG2	18	21	16	15	17.5	No
Hippocampus	7days	nODC	13	16	16	15	15	No
Hippocampus	7days	ODC	1	1	1	5	2	No
Hippocampus	7days	OPC	7	10	7	5	7.25	No
Hippocampus	7days	PER	15	20	11	5	12.75	No
Hippocampus	7days	SMC	11	17	9	2	9.75	No
Hippocampus	7days	SUB	16	4	11	5	9	No

## Sheet: Sheet3
Tissue	Timepoint	Cell Type	ED	SVM	DEG	Subset	Avg Rank
Blood	24hrs	Cd8 T Cell	3	1	2	1	1.75
Blood	24hrs	Cd4 T Cell	2	5	1	1	2.25
Blood	24hrs	Ly6c+ Mon	5	3	4	3	3.75
Blood	7days	Cd8 T Cell	4	1	2	1	2
Blood	7days	B Cells	1	3	1	5	2.5
Blood	7days	Ly6c+ Mon	3	2	5	3	3.25
Frontal Cortex	24hrs	Astrocytes	1	2	1	1	1.25
Frontal Cortex	24hrs	Endothelial	2	6	4	4	4
Frontal Cortex	24hrs	Oligodendrocyte	4	4	3	5	4
Frontal Cortex	7days	Endothelial	1	8	1	5	3.75
Frontal Cortex	7days	Astrocytes	2	7	3	5	4.25
Frontal Cortex	7days	Activated Microglia	3	11	2	2	4.5
Hippocampus	24hrs	Astrocytes	1	1	1	1	1
Hippocampus	24hrs	Activated Microglia	2	4	2	2	2.5
Hippocampus	24hrs	Microglia	5	5	4	3	4.25
Hippocampus	7days	Oligodendrocyte	1	1	1	5	2
Hippocampus	7days	Astrocytes	4	2	3	2	2.75
Hippocampus	7days	Activated Microglia	2	8	2	5	4.25

## Sheet: Sheet2
Supplementary Table 4. Consensus ranks of transcriptome perturbation across three different metrics.
Tissue	Timepoint	Cell Type	ED Rank	SVM Rank	Subset DEG Rank	Average Rank	Cell Fraction Shift		Tissue	Timepoint	Cell Type	ED Rank	SVM Rank	Subset DEG Rank	Average Rank	Cell Fraction Shift
Blood	24hrs	Cd8 T Cells	3	1	1	1.66667	No		Blood	24hrs	Cd8 T Cells	3	1	1	1.66667	No
Blood	24hrs	Cd4 T Cells	2	5	1	2.66667	No		Blood	24hrs	Cd4 T Cells	2	5	1	2.66667	No
Blood	24hrs	Ly6c+ Monocytes	5	3	3	3.66667	No		Blood	24hrs	Ly6c+ Monocytes	5	3	3	3.66667	No
Blood	7days	Cd8 T Cells	4	1	1	2	No		Blood	7days	Cd8 T Cells	4	1	1	2	No
Blood	7days	Ly6c+ Monocytes	3	2	3	2.66667	No		Blood	7days	Ly6c+ Monocytes	3	2	3	2.66667	No
Blood	7days	B Cells	1	3	5	3	No		Blood	7days	B Cells	1	3	5	3	No
Frontal Cortex	24hrs	Astrocytes	1	2	1	1.33333	No		Frontal Cortex	24hrs	Astrocytes	1	2	1	1.33333	No
Frontal Cortex	24hrs	Layer 2/3 Neurons	8	1	2	3.66667	No		Frontal Cortex	24hrs	Layer 2/3 Neurons	8	1	2	3.66667	No
Frontal Cortex	24hrs	Endothelial	2	6	4	4	No		Frontal Cortex	24hrs	Endothelial	2	6	4	4	No
Frontal Cortex	7days	Endothelial	1	8	5	4.66667	No		Frontal Cortex	7days	Endothelial	2	7	5	4.66667	No
Frontal Cortex	7days	Astrocytes	2	7	5	4.66667	No		Frontal Cortex	7days	Astrocytes	1	8	5	4.66667	No
Frontal Cortex	7days	Activated Microglia	3	11	2	5.33333	No		Frontal Cortex	7days	Activated Microglia	3	11	2	5.33333	No
Hippocampus	24hrs	Astrocytes	1	1	1	1	No		Hippocampus	24hrs	Astrocytes	1	1	1	1	No
Hippocampus	24hrs	Activated Microglia	2	4	2	2.66667	No		Hippocampus	24hrs	Activated Microglia	2	4	2	2.66667	No
Hippocampus	24hrs	Microglia	5	5	3	4.33333	No		Hippocampus	24hrs	Microglia	5	5	3	4.33333	No
Hippocampus	7days	Oligodendrocytes	1	1	5	2.33333	No		Hippocampus	7days	Oligodendrocytes	1	1	5	2.33333	No
Hippocampus	7days	Astrocytes	4	2	2	2.66667	Yes		Hippocampus	7days	Astrocytes	4	2	2	2.66667	Yes
Hippocampus	7days	Choroid Plexus Epithelial	6	5	2	4.33333	No		Hippocampus	7days	Choroid Plexus Epithelial	6	5	2	4.33333	No

## Sheet: Sheet5
Tissue	Timepoint	Cell Type	ED Rank	SVM Rank	Subset DEG Rank	Average Rank	Cell Fraction Shift
Blood	24hrs	CD8T	3	1	1	1.66667	No
Blood	24hrs	CD4T	2	5	1	2.66667	No
Blood	24hrs	Ly6c+.Mon	5	3	3	3.66667	No
Blood	7days	CD8T	4	1	1	2	No
Blood	7days	Ly6c+.Mon	3	2	3	2.66667	No
Blood	7days	B.Cells	1	3	5	3	No
Frontal Cortex	24hrs	ASC	1	2	1	1.33333	No
Frontal Cortex	24hrs	Layer23	8	1	2	3.66667	No
Frontal Cortex	24hrs	END	2	6	4	4	No
Frontal Cortex	7days	ASC	2	7	5	4.66667	No
Frontal Cortex	7days	END	1	8	5	4.66667	No
Frontal Cortex	7days	aMG	3	11	2	5.33333	No
Hippocampus	24hrs	ASC	1	1	1	1	No
Hippocampus	24hrs	aMG	2	4	2	2.66667	No
Hippocampus	24hrs	MG	5	5	3	4.33333	No
Hippocampus	7days	ODC	1	1	5	2.33333	No
Hippocampus	7days	ASC	4	2	2	2.66667	Yes
Hippocampus	7days	CPE	6	5	2	4.33333	No
